1 **Express Arm Responses Appear Bilaterally on Upper-limb Muscles in Arm Choice**  
2 **Reaching Task**

3  
4

5 Abbreviated title: Express arm responses appear bilaterally

6

7 Sarah L. Kearsley<sup>1,4</sup>, Aaron L. Cecala<sup>3,4</sup>, Rebecca A. Kozak<sup>1,4</sup>, Brian D. Corneil<sup>1,2,3,4</sup>

8

9 <sup>1</sup>Graduate Program in Neuroscience, Western University, London, On, Canada, N6A 5B7

10 <sup>2</sup>Department of Psychology, Western University, London, Ontario, Canada, N6A 5B7

11 <sup>3</sup>Department of Physiology and Pharmacology, Western University, London, Ontario, Canada,

12 N6A 5B7

13 <sup>4</sup>Robarts Research Institute, 1151 Richmond St. N, London, Ontario, Canada, N6A 5B7

14

15 Number of pages: 39

16 Number of figures: 8

17 Number of tables: 0

18 Number of words: 9218

19 Abstract: 254

20 Introduction: 626

21 Discussion: 2651

22 Conflicts of interest: The authors declare no competing financial interests

23 Acknowledgements: This work is supported by a Discovery Grant to BDC from the Natural

24 Sciences and Engineering Research Council of Canada (NSERC; RGPIN 311680) and an

25 Operating Grant to BDC from the Canadian Institutes of Health Research (CIHR; MOP-93796).

26 SLK was supported by a NSERC CGS-M. RAK was supported by an Ontario Graduate

27 Scholarship. The equipment apparatus used in this experiment was purchased using funds from

28 the Canadian Foundation for Innovation. Additional support came from the Canada First

29 Research Excellence Fund (BrainsCAN).

30

31 **Abstract**

32 When required, humans can generate very short latency reaches towards a visual target, like  
33 catching a phone falling off a desk. During such rapid reaches, express arm responses are the  
34 first wave of upper limb muscle recruitment, occurring within ~80-100 ms of target appearance.  
35 There is accumulating evidence that express arm responses arise from signaling along the tecto-  
36 reticulo-spinal tract, but the involvement of the reticulo-spinal tract has not been well-studied.  
37 Since the reticulospinal tract projects bilaterally, we studied whether express arm responses  
38 would be expressed bilaterally. Human participants (n = 14; 7 female) performed visually  
39 guided reaches in a modified emerging target paradigm where either arm could be used to  
40 intercept a target once it emerged below a barrier. We recorded electromyographic activity  
41 bilaterally from the pectoralis major muscle. Our analysis focused on target locations where  
42 participants reached with the right arm on some trials, and the left arm on others. In support of  
43 the involvement of the reticulospinal tract, the express arm response persisted bilaterally  
44 regardless of which arm reached to the target. While the latency of the express arm response was  
45 the same on the reaching vs non-reaching arm, the response magnitude was slightly larger on the  
46 reaching arm, in part due to anticipatory muscle recruitment related to arm choice. Our results  
47 support the involvement of the reticulo-spinal tract in mediating the express arm response, and  
48 we surmise that the increased magnitude on the arm chosen to move arises from convergence of  
49 cortically derived signals with the largely independent express arm response.

50

51 New and Noteworthy: Express arm responses have been proposed to arise from the tecto-  
52 reticulo-spinal tract. These responses have been linked to the superior colliculus, but the  
53 involvement of the reticulo-spinal tract has not been well studied. Here we show these responses

54 appear bilaterally regardless of arm choice when either arm can be used to intercept a newly  
55 appearing stimulus, supporting involvement of the reticulo-spinal tract. We propose this response  
56 is mediated largely independent of the volitional cortical related activity.

57

58 Keywords: express arm response, visually-guided reaches, EMG, reticulo-spinal tract

59

## 60 **Introduction**

61           When time is of the essence, like when catching a phone knocked off a desk,  
62 visuomotor transformations can occur at times approaching the minimal afferent and efferent  
63 conduction delays. A useful marker for these rapid visuomotor transformations is an express arm  
64 response. The express arm response, which has also been termed the stimulus locked response  
65 (1) or rapid visual response (2), is a burst of upper-limb muscle recruitment that consistently  
66 occurs ~100ms after stimulus appearance, regardless of the reach reaction time (1, 3, 4). The  
67 term express arm response was coined to reflect the shared properties of this aspect of upper-  
68 limb muscle recruitment with the visual burst of visuomotor neurons in the intermediate and  
69 deep layers of the superior colliculus, and with express saccades (5). Express saccades, express  
70 arm responses, and the visual burst of visuomotor neurons are all directed toward the location of  
71 a visual stimulus, regardless of instructions to move in the opposite direction (4, 6–8). All three  
72 responses are also preferentially evoked by stimuli composed of low spatial frequencies and high  
73 contrast (9–12). Further, the magnitudes of both express arm responses and the visual burst of  
74 the visuomotor neurons are inversely related to the ensuing reaction time (1, 4, 6, 13). These  
75 shared properties support the hypothesis that express arm responses are mediated by the superior  
76 colliculus (1, 4, 9, 10).

77           In non-human primates (14) and likely humans, the communication between the superior  
78 colliculus and the spinal cord is likely indirect, with an interface in the reticular formation.  
79 Consistent with this potential relay, express arm responses in humans are augmented by non-  
80 visual stimuli thought to excite the reticular formation (2). A distinctive feature of the reticular  
81 formation is its extensive bilateral projections to upper-limb muscles (15–17). To date, express  
82 arm responses have been studied only in unimanual reaching tasks. The goal of this study is to

83 test whether express arm responses would be expressed bilaterally when either arm can be used  
84 to reach to a visual target.

85         Previous work has shown an emerging target paradigm, wherein a moving target  
86 transiently disappears and then emerges from behind a barrier elicits robust express arm  
87 responses on the reaching arm in almost every participant (5, 9, 18, 19). Here, we modified this  
88 paradigm by increasing the number of potential locations of target emergence and allowing the  
89 subject to reach toward the emerging target with either arm. These modifications elicited reaches  
90 by either the left or right arm for different target locations, and at certain locations elicited left  
91 arm reaches on some trials and right arm reaches on other trials. Muscle recruitment for reaches  
92 toward these latter locations is critical for our primary aim, which is to determine whether the  
93 expression of express arm responses depended on whether the arm was chosen to reach to the  
94 target or not. Further, as our task requires participants to choose which arm to move toward the  
95 emerging target, a secondary aim was to determine when limb muscle activity indicated whether  
96 the associated arm would reach to the target or not. In doing so, we can assess the presence or  
97 absence of any relationship between the commitment to move a particular arm and the express  
98 arm response. Overall, we found that express arm responses evolved on both the chosen and non-  
99 chosen arm. We also found that the time at which limb muscle recruitment indicated which arm  
100 would reach to the target was highly variable and was unrelated to the timing of express arm  
101 responses. These findings are consistent with express arm responses being relayed through the  
102 reticular formation along a tecto-reticulo-spinal pathway and illustrate a surprising degree of  
103 independence between the expression of express arm responses and the decision to commit to  
104 moving one arm or the other.

105

## 106 **Methods and Materials**

### 107 *Participants*

108           15 participants (8 males, 7 females; mean age: 21.8 years SD: 1.9) provided informed  
109 written consent, were paid for their participation, and were free to withdraw from the experiment  
110 at any time. All participants had normal or corrected-to-normal vision, with no current visual,  
111 neurological, or musculoskeletal disorders. All participants completed the short form Edinburgh  
112 Handedness Inventory (20, 21) which indicated 12 participants were right-handed, 2 mixed-  
113 handed, and 1 left-handed. All procedures were approved by the Health Science Research Ethics  
114 Board at the University of Western Ontario. One participant (left-handed male) was excluded  
115 due to a failure to follow task instruction, as they routinely initiated arm movements before target  
116 emergence.

117

### 118 *Apparatus*

119 Participants generated reaching movements with their left and right arms in a bimanual  
120 KINARM end-point robot (BKIN Technologies, Kingston, ON, Canada). Movements were  
121 generated in the horizontal plane via two handles through shoulder and elbow flexion and  
122 extension. A custom built-in projector (ProPixx projector, VPixx, Saint-Bruno, QC, Canada)  
123 generated visual stimuli onto an upward facing mirror, located at approximately shoulder height.  
124 All visual stimuli were white ( $110 \text{ cd/m}^2$ ) presented against a black ( $.6 \text{ cd/m}^2$ ) background  
125 (contrast ratio: 183:1). A shield below the mirror occluded direct vision of the hands, but real-  
126 time hand positions were represented via two white dots each with a diameter of 1 cm (which  
127 equates to approximately 1 degree of visual angle). Throughout the experiment, constant forces

128 of 2 N towards the participant and 5N outward for each hand were applied to increase tonic  
129 activity in the pectoralis major (PEC) muscle.

130

### 131 *Experimental Design*

132 Participants completed a modified version of the emerging target paradigm (18) (**Figure**  
133 **1A**). Participants initiated each trial by bringing their left and right hand, represented by a 1.5cm  
134 diameter white target, into a round, 2cm diameter white starting position, located 45 cm in front  
135 of them, and 23 cm to the left and right of center respectively. These starting positions  
136 disappeared once the trial was initiated. Simultaneous with the start of the trial, a white target  
137 (1.5 cm) located above an occluder began moving toward the participant at 15 cm/s. The target  
138 disappeared behind the occluder for a fixed duration of 1.5 s before emerging in motion at 15  
139 cm/s below the occluder at one of 7 locations, appearing either at the horizontal center of the  
140 occluder, or 3, 7, or 17 cm to the left or right of this central position. Target motion was vertical  
141 both before and after disappearance behind the occluder, regardless of where the target emerged.  
142 Thus, the time between target disappearance and appearance was fixed at 1500 ms for all target  
143 locations. The target was only presented in its entirety after it moved beneath the occluder,  
144 preventing the presentation of a half-moon stimulus with a lower overall area. At the time of  
145 target emergence, a visual stimulus unseen by the subject was also presented to a photodiode,  
146 and all electromyographic (EMG) and kinematic data were aligned to this time.

147

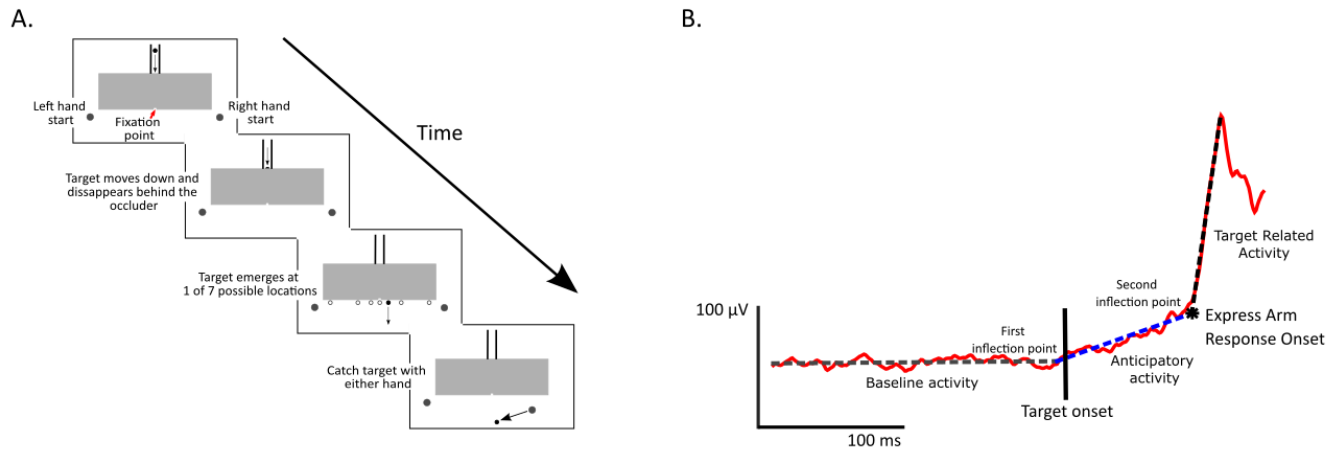

148

149 Figure 1. Modified emerging target paradigm and method for classifying express arm responses.  
150 A) At the start of each trial, the target appears above an occluder (grey box), and participant  
151 brings their right and left hands into the start position. The target then moves down the chute,  
152 disappears briefly behind the occluder, before re-emerging below the occluder at one of seven  
153 different locations (possible target locations are shown, but these were not presented to the  
154 subject). Participants reached to intercept the target with either the right or left arm. B) We fit  
155 muscle activity with a three-piece linear regression, differentiating recruitment during a baseline,  
156 anticipatory, and target-related interval. The time of the second inflection between anticipatory  
157 and target-related activity represents the start of the express arm response onset.  
158

159 Although eye movements were not measured, participants were instructed to foveate a  
160 notch in the center of the occluder, 47 cm in front of them, from the start of each trial until the  
161 target re-emerged under the barrier. Upon target emergence, participants were instructed to reach  
162 toward the emerging target as quickly as possible and were told that they could use either arm to  
163 do so. Participants completed four blocks of 350 trials each, with each block containing 50  
164 pseudorandomly intermixed repetitions of each location, yielding a total of 200 trials for each  
165 target location.

166

### 167 *Data acquisition and analysis*

168 Surface EMG activity was recorded from the clavicular head of the right and left  
169 pectoralis major muscle (PEC) with double-differential surface electrodes (Delsys Inc. Bagnoli-8



170 system, Boston, MA USA). Two electrodes were placed on each the right and left PEC, targeting  
171 the clavicular and sternal head. Our reasoning for placing two electrodes was to provide a backup  
172 in case adhesion was lost during a long experiment. The recording that exhibited the higher  
173 signal to noise ratio off-line was chosen for each participant (10). To ensure consistency, the  
174 same individual placed electrodes for all participants, using anatomical landmarking and muscle  
175 palpation to determine location. EMG signals were amplified by 1000, sampled by the KINARM  
176 data system at 1000 Hz, then full wave rectified off-line. Kinematic data was also sampled at  
177 1000 Hz by the KINARM data system.

178         To allow cross-muscle comparisons, we normalized the EMG activity to baseline,  
179 dividing EMG activity on each trial by the average EMG activity between -500 to -100ms before  
180 target onset across all trials. Normalized muscle activity was only used when comparing the  
181 magnitudes of recruitment across different muscles, otherwise, source EMG voltages was  
182 analyzed.

183         Reaction time (RT) was calculated as the time from target appearance below the  
184 occluder, indicated by the photodiode, to the initiation of the reaching movement by the arm that  
185 intercepted the target. The reach RT for each trial was determined using a custom MATLAB  
186 script that found the time when the hand exceeded 5% of its peak velocity of the hand after target  
187 onset, and then moved backwards in time to find the point at which hand acceleration following  
188 target onset exceeded the 95% confidence interval of acceleration data taken from a period of  
189 100 ms before to 50 ms after target onset. The offset of hand motion was the time at which hand  
190 velocity fell below 5% of its peak velocity. The onset and offset of movements were confirmed  
191 offline by an analyst in a graphical user interface and adjusted if necessary. We excluded trials  
192 with RTs less than 100 ms due to presumed anticipation, and trials with RTs exceeding 500 ms

193 due to presumed inattentiveness. 16% of trials were excluded using these RT constraints,  
194 primarily due to anticipatory movements. We also excluded trials consisting of multiple  
195 movement segments toward the target, excluding ~2% of trials.

196 Arm-choice was defined simply as the arm that intercepted the target. A psychometric  
197 function was generated using the proportion of right arm reaches as function of target location.  
198 For each participant a logistic regression was fit to the data, using the link logit MATLAB  
199 function:  $f(p) = \log\left(\frac{p}{1-p}\right)$ , where  $p$  is the proportion of right arm reaches. Using the fitted  
200 curve, we estimated the theoretical point where a target would be intercepted with either the left  
201 or right arm with equal likelihood. The closest target location to this point, referred to as the  
202 target of subjective equality, was then used for further analyses, as this target location permitted  
203 the best within-muscle comparison of recruitment when that arm was chosen to reach to the  
204 target or not.

205 Previous work examining the express arm response has used a time-series receiver-  
206 operating characteristic analysis, contrasting EMG activity for movements into or away from a  
207 muscle's preferred direction (1, 22). Since a given arm only moved in one direction in our study  
208 (e.g., all targets lay to the left or right of the right or left arm, respectively), we developed a novel  
209 method for detecting and quantifying the express arm response. Our method involves a three-  
210 piece linear regression, fitting lines to EMG activity in a baseline, anticipatory, and post-target  
211 interval (see (5, 23) for methods based on a two-piece linear fit). Our rationale for using a three-  
212 piece linear regression was based on a qualitative observation of mean EMG recruitment, which  
213 often started to increase in an anticipatory fashion before and just after target appearance (**Figure**  
214 **1B**).

215 To determine the presence or absence of an express arm response, we took the following  
216 steps. First, we ensured that there were at least 25 reaches from a given arm to a particular target  
217 (most targets only generated enough reaches from one arm). Whenever there were enough  
218 reaches from a given arm, we further analyzed the muscle activity from both the left and right  
219 PEC, as this provides us with EMG activity from both the reaching and non-reaching arm. We  
220 then fit the mean EMG activity spanning from 100 ms before target onset to the time of the peak  
221 EMG activity within 135 ms after target onset with three linear regressions. Doing so involved  
222 finding two inflections points that minimized the sum of square errors, delineating the baseline  
223 activity (spanning from -100 ms to the first inflection point), anticipatory activity (spanning from  
224 the first to second inflection point), and the target-related interval (spanning from the second  
225 inflection point to the peak EMG activity; see **Figure 1B**). For an express arm response to be  
226 detected, the second inflection point had to occur within 80-105 ms, and the slope of the second  
227 and third linear regressions had to be significantly different at  $P < 0.05$ , as determined by a  
228 bootstrapping procedure. When present, the express arm response latency was defined as the  
229 time of the second inflection point, and the express arm response magnitude was defined as the  
230 difference of the peak EMG activity over the next 15ms to the EMG activity at the onset of the  
231 response. Anticipatory activity was defined as the level of normalized muscle activity  
232 immediately preceding the express arm response.

233 In a separate analysis to determine at what point muscle activity reflected arm choice, we  
234 used a time-series receiver-operating characteristic (ROC) analysis from EMG activity recorded  
235 when participants reach to the target of subjective equality. This target location provided a large  
236 sample of EMG activity from a given muscle on trials where the associated arm or the opposite  
237 arm reached to the target. We were interested in the time-point when EMG activity from a given

238 muscle diverged depending on whether the arm was chosen to reach to the target or not. We  
239 separated EMG activity based on which arm reached to the target then analyzed at every time  
240 sample (1 ms) from 500ms before target onset to the end of the trial. For each time-point we  
241 calculated the area under the ROC curve, which is the probability that an ideal observer could  
242 discriminate whether the associated arm would reach to the target or not, based solely on the  
243 EMG activity. Values of 1 or 0 indicate perfectly correct or incorrect discrimination respectively,  
244 whereas a value of 0.5 indicates chance discrimination. We set the threshold discrimination at  
245 0.6 because this criterion exceeded the 95% confidence intervals determined previously using a  
246 bootstrapping procedure (23). The time of discrimination was defined as the first point in time at  
247 which the ROC value exceeded 0.6 for at least eight of ten subsequent time-samples.

248

#### 249 *Statistical Analysis*

250 Statistical analyses were performed in MATLAB (version 2014b, The MathWorks, Inc.,  
251 Natick, Massachusetts, United States). To compare the proportion of participants expressing an  
252 express arm response (termed express arm response prevalence) as a function of muscle, arm  
253 choice, and location, a chi-squared test was used, and Bonferroni corrected when necessary. A  
254 paired-t test was used to compare the latency and magnitude of the express arm response within a  
255 muscle at the target of subjective equality. We relied on non-normalized EMG for our magnitude  
256 analysis for within muscle comparisons.

257

#### 258 **Results**

259 The reticular formation is a likely relay in the pathway mediating express arm responses.  
260 Given the bilateral projections from the reticular formation, we wondered whether express arm

261 responses would be expressed bilaterally in a task where participants could choose which arm to  
262 use to intercept an emerging target. We recorded muscle activity from the right and left PEC  
263 muscles as participants completed a modified emerging target paradigm (**Figure 1A**). Targets  
264 could emerge at one of seven locations below the barrier, and participants reached to catch the  
265 target as fast as possible with either arm. We analysed muscle activity from both the reaching  
266 and non-reaching arm to determine the presence of the express arm response. We also examined  
267 the time at which muscle activity indicated that the associated arm would reach toward the target  
268 or not, relative to the time of the express arm response.

269

#### 270 *Arm-choice as a function of target location, and defining the target of subjective equality*

271 On every trial, participants chose which arm to move. As shown in **Figure 2**, arm-choice  
272 typically reflected the hemifield of target presentation, with the right or left arm reaching for  
273 targets emerging in the right or left visual field, respectively. We quantified participant  
274 behaviour by fitting a psychometric curve to the proportion of right arm reaches expressed as a  
275 function of target location. The point of subjective equality defines the theoretical target location  
276 where a participant would reach with one arm on half of all trials, and with the other arm on the  
277 other half of trials. From the point of subjective equality, we found the closest actual target  
278 location, referred to as the target of subjective equality, for each participant (see **Figure 2A** for a  
279 representative subject). This location was associated with a high number of reaches from either  
280 arm in all participants. Across our sample, the target of subjective equality was at center ( $n = 10$ ),  
281 3 cm left ( $n = 2$ ) or 7 cm left ( $n = 2$ ) of center (**Figure 2B**). The target of subjective equality  
282 permits a within-muscle comparison of recruitment when the associated arm was chosen to reach

283 or not. In general, locations other than the target of subjective equality did not generate enough  
284 reaches from either arm for within muscle comparisons.

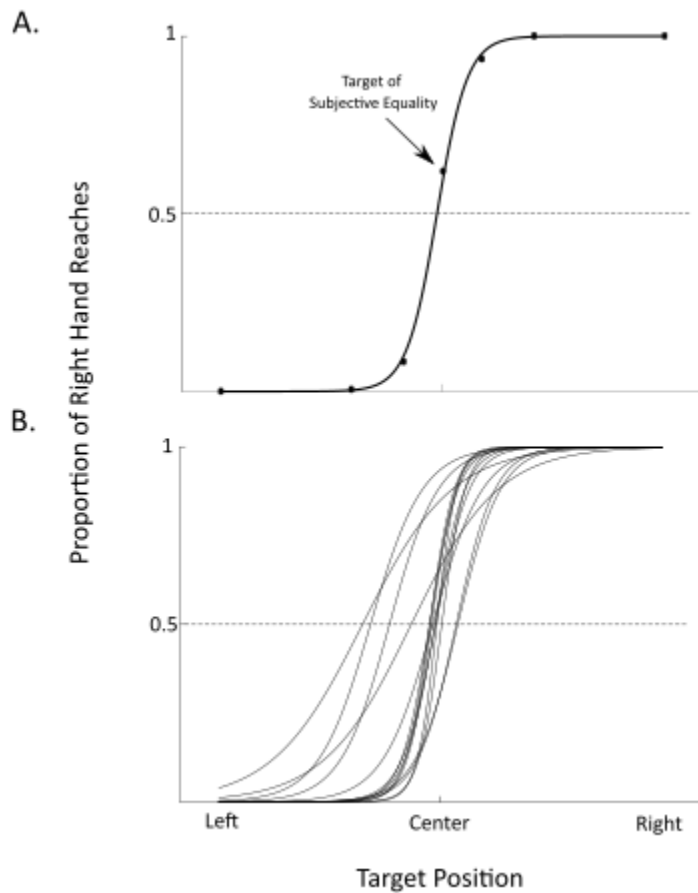

285 Figure 2. Arm Choice as a Function of Target location. A: A single participant example of right  
286 arm choice as a function of target location. Each black dot represents a location where the target  
287 emerged on a subset of the trials. A psychometric function was fit to the data and the target of  
288 subjective equality was chosen as the target closest to the horizontal dash line. B: Psychometric  
289 functions for each participant.

290  
291 *Do express arm responses appear bilaterally?*

293 The main question we wanted to address was whether express arm responses evolve  
294 bilaterally when either arm could be used to intercept an emerging target. **Figure 3A** shows the  
295 average muscle activity from an exemplar participant (same subject as **Figure 2B**), across all  
296 positions where at least 25 reaches were made by the associated arm. This data shows how  
297 participants tended to reach with the arm closest to the target (e.g., note how the right or left arm

298 tended to reach for targets in the right or left hemifield, respectively). Using a three-piece linear  
299 regression to determine whether there was an express arm response (**Figure 1B**, see Methods),  
300 we observed express arm responses in both the reaching and non-reaching arm (express arm  
301 responses are denoted by the black dots in **Figure 3A**). In some instances where an express arm  
302 response was not detected (e.g., left arm reaches to the 0cm target), the slope of the third linear  
303 regression was not significantly different from the second linear regression as determined by a  
304 bootstrapping procedure, or the time of inflection was below 85 or above 105ms. When detected,  
305 express arm responses occurred ~90ms after target appearance in both the reaching and non-  
306 reaching arms.

307         Previous reports have emphasized that the trial-by-trial timing of express arm responses  
308 is more aligned to stimulus rather than movement onset (1, 4). We examined trial-by-trial  
309 representations of muscle recruitment, and as shown in **Figure 3B**, found indeed that the timing  
310 of express arm responses was more tied to stimulus rather than movement onset, regardless of  
311 whether the associated arm reached or not. This characteristic feature of express arm responses  
312 appears as the vertical banding of EMG activity in **Figure 3B** when muscle activity is aligned to  
313 stimulus onset, showing a burst of muscle recruitment ~90 ms after target emergence regardless  
314 of the ensuing reach RT. Following this bilateral generation of the express arm response, a more  
315 prolonged period of increased recruitment was observed only on the reaching arm (the right arm  
316 for the data in Figure 3B).

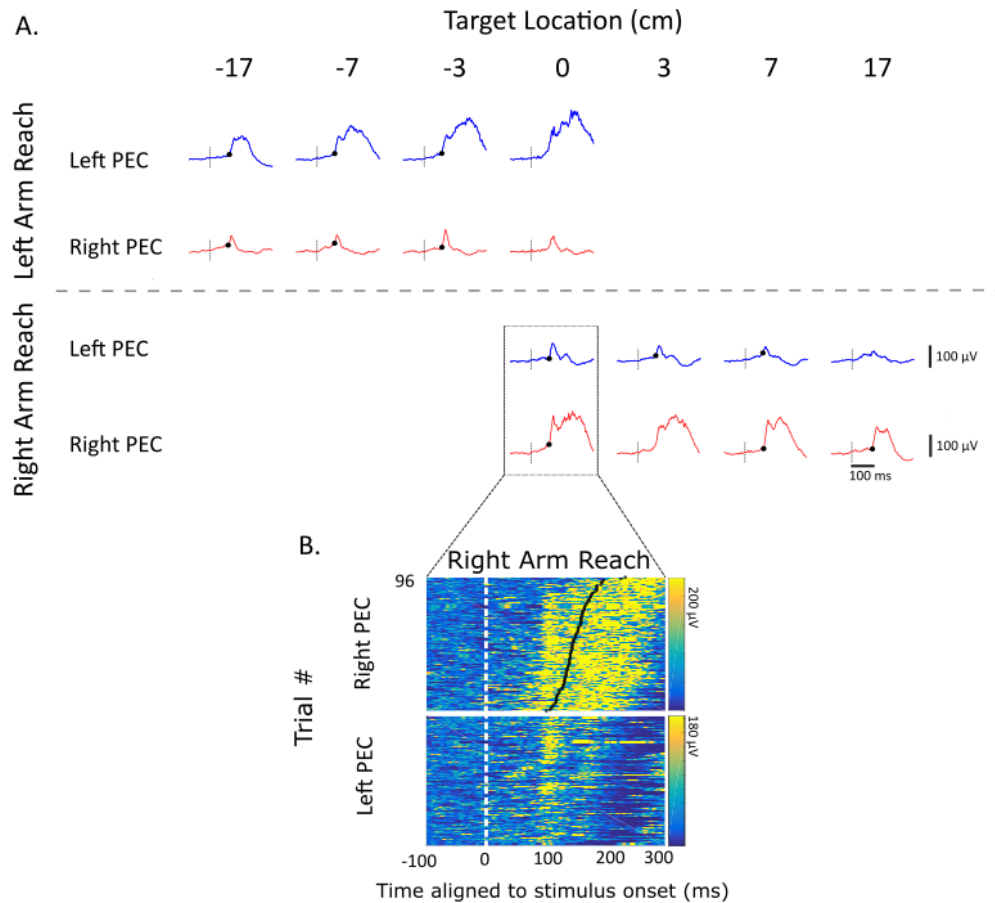

317

318 Figure 3. Bilateral muscle recruitment in a representative participant. A) Average muscle  
319 activity (+/- SE) for all reaches as a function of target location. Averages are plotted only if there  
320 were at least 25 trials where the given arm reached to the target. The 0 cm location is the target  
321 of subjective equality, as this featured many trials where either the right or left arm reached to  
322 the target. Stimulus onset indicated by the black vertical dotted line. Black dots represent the  
323 point at which an express arm response was detected (I.e., the inflection between the second and  
324 third linear regressions, providing the slope was significantly different) B) Depiction of trial-by-  
325 trial recruitment from right (top) and left (bottom) pectoralis muscle during right arm reaches.  
326 Each row is a different trial, with the intensity of color conveying degree of recruitment. Trials  
327 are aligned to stimulus onset (white vertical dotted line) and sorted by RT (black dots are only  
328 shown on right PEC, since the right arm reached). The express arm response appears as a vertical  
329 banding of increased recruitment that is more aligned to stimulus presentation, respectively,  
330 rather than movement onset.  
331

332

The prevalence of express arm responses is known to vary across paradigms and

333

participants (1, 5, 9, 10). We wanted to know whether all participants had express arm responses



334 in general, and further whether the responses were equally prevalent in the reaching and non-  
335 reaching arms. As shown in **Figure 4**, the modified emerging target paradigm elicited express  
336 arm responses from at least three participants at each location. Further, all participants generated  
337 express arm responses toward at least one target location. We compared the prevalence of  
338 express arm responses in the reaching and non-reaching arm grouped across all locations, and  
339 further at each location individually. Using a chi-squared test we found express arm responses  
340 occurred at equal prevalence in the reaching and non-reaching arms across all locations ( $p= 0.44$ ,  
341  $\chi^2= 0.4385$ ,  $df=1$ ), and further at each location ( $p > 0.05$ ,  $\chi^2 < 3.36$ ,  $df=1$ ). These analyses  
342 reinforce our observations that express responses evolve bilaterally on both upper limbs in this  
343 task.

344 We also examined whether there was a difference in the prevalence of express arm  
345 responses as a function of target location. Using a chi-squared test with Bonferroni corrected for  
346 multiple comparisons ( $\alpha = 0.0083$ ) and grouping targets based on distance from the center  
347 (e.g., combining data for the 17 cm right and 17 cm left targets), we found that express arm  
348 responses were significantly less likely for the 17 cm locations ( $p < 0.0083$ ). No other  
349 differences were found based on location.

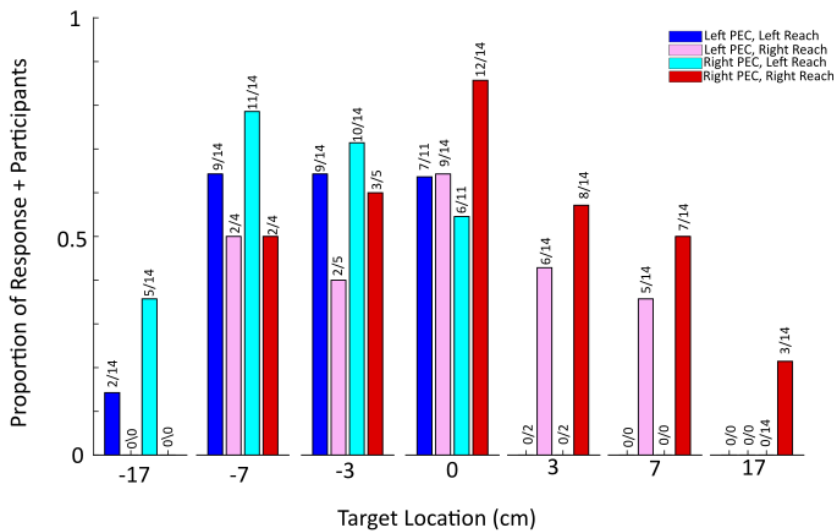

350  
351 Figure 4. Proportion of subjects exhibiting an express arm response as a function of arm and  
352 target location. At each target location prevalence is determined as the proportion of participants  
353 exhibiting an express arm response relative to the number of subjects who generated enough  
354 reaches with the given arm at that particular location (recall at least 25 reaches had to be made by  
355 a given arm for the analysis of the express arm response).  
356

### 357 *Express arm response properties*

358 Next, we were interested in the latency and magnitude of express arm responses recorded  
359 bilaterally, and whether these measures differed depending on whether the associated arm was  
360 selected to move or not. If mediated by a common source like the reticular formation, we would  
361 expect the magnitude of express arm responses on the reaching and non-reaching arm to be  
362 correlated across participants and targets (e.g., a larger express arm response on the reaching arm  
363 should be associated with a larger express arm response on the non-reaching arm). For this  
364 analysis, we identified target locations where an express arm response was observed on both the  
365 reaching and non-reaching arm, and found that express arm response magnitudes were indeed  
366 positively correlated between the muscles (**Figure 5A** Pearson correlation,  $p < 0.001$ ,  $r = 0.699$ ;  
367 every point represents a unique observation for a participant and target location where express  
368 arm responses were objects bilaterally; note magnitudes are normalized here since this is a

369 comparison of magnitude across muscles). Thus, larger express arm response magnitudes on the  
370 reaching arm tended to be associated with larger express arm response magnitudes on the non-  
371 reaching arm. On average, the magnitude of the express arm responses was about twice as large  
372 on the reaching versus non-reaching arm.

373 Previous work has shown that express arm responses may differ in latency (10) and/or  
374 magnitude (4) depending on stimulus properties and task context. We examined express arm  
375 response latency and magnitude within a given muscle at the target of subjective equality,  
376 analyzing these properties depending on whether the associated arm was chosen to reach or not.  
377 Note that this is a within-muscle comparison, where we analyze express response latency and  
378 magnitude as a function of whether the associated arm was chosen to move or not. Using only  
379 paired observations (i.e., when express arm responses were detected in a given muscle regardless  
380 of whether the arm was chosen to move or not) we found no difference in express arm response  
381 latency with arm choice (**Figure 5B**;  $p = 0.5911$ ,  $t = -0.5520$ ,  $df = 12$ ). Further, using a single  
382 factor ANOVA we found no difference in response latency across target locations ( $p > 0.05$ ).  
383 These results reinforce the qualitative observation from **Figure 3A** that the express arm response  
384 evolves consistently ~90 ms irrespective of arm choice. Although latency was not affected by  
385 arm choice, the normalized express arm response magnitude was ~1.5 times larger when the  
386 associated arm was chosen to move or not at the point of equal selection (**Figure 5C**;  $p = 0.0365$ ,  
387  $t = 2.3534$ ,  $df = 12$ ), but response magnitude was unchanged across target locations (single  
388 factor ANOVA,  $p > 0.05$ ).

389 While the influence of arm choice on express arm response magnitude was significant at  
390 the target of equal selection across our sample, **Figure 5C** shows that this was not the case in all  
391 participants, leading us to wonder whether about the influence of other factors. For example, the

392 magnitude of the express arm response can be influenced by task instruction (3, 4). In our  
393 paradigm, participants knew in advance that targets would appear medial relative to the starting  
394 position of both the left and right arm, leading us to wonder if participants anticipated which arm  
395 to use prior to target emergence. To analyze the potential influence of such anticipation, we  
396 examined anticipatory activity on a given muscle as a function of whether the associated arm  
397 was chosen to reach or not and found greater anticipatory activity when the associated arm was  
398 chosen to reach to the target (**Figure 5D**; paired t-test,  $p = 0.0035$ ,  $t = 3.6278$ ,  $df = 12$ ). This  
399 relationship between anticipatory activity and arm choice can be seen in **Figure 3A** on the right  
400 PEC at the 0 cm target; note how anticipatory activity preceding the express arm response was  
401 greater when the right rather than left arm reached to the target. This level of anticipatory  
402 activity related to the magnitude of the ensuing express arm response (n.b., the latter measure  
403 quantifies the EMG magnitude above anticipation), as we found a positive correlation between  
404 these measures for both the reaching and non-reaching arms (**Figure 5E**;  $r = 0.8394$ ,  $p < 0.001$ ).  
405 Thus, the level of anticipatory activity attained just before the express arm response related to the  
406 magnitude of the express arm response.

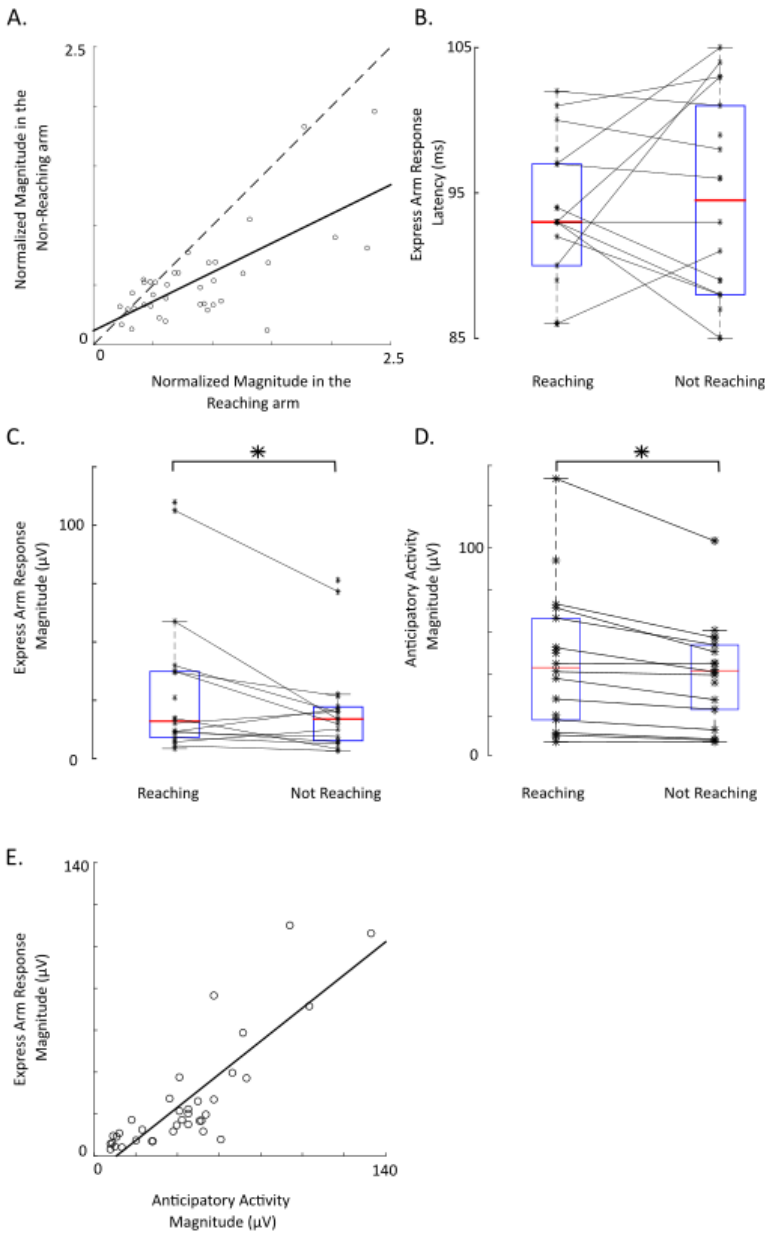

407

408 Figure 5. Analyses of the characteristics of express arm response A) The magnitude of the  
409 express arm response in the reaching and non-reaching arm are significantly correlated across  
410 participants ( $r = 0.699$ ,  $p < 0.001$ ). Each dot represents a unique combination of target and  
411 subject where express arm responses were observed on both the reaching and non-reaching arm.  
412 The black line indicates the linear regression fit, and the dashed line represents the line of unity.  
413 B, C) The latency (B) or magnitude (C) of the express arm response as a function of whether the  
414 associated arm reached or not, taken from the target of equal selection. Lines connect within-  
415 muscle observations. In C, significantly larger express arm responses are observed on the  
416 reaching arm. ( $p = 0.03$ ). D) Anticipatory activity, measured as the level of EMG activity just  
417 prior to the express arm response. Same format as B. Anticipatory activity was significantly  
418 higher when the arm was selected to reach to the target ( $p = 0.0035$ ). E) Correlation of the level

419 of anticipatory activity to the magnitude of the express arm response ( $r = 0.8394$ ,  $p < 0.001$ ).  
420 Each dot represents an observation, with the black line indicating the linear regression fit.

421

422 *When, relative to the express arm response, does muscle activity relate to arm choice?*

423       The preceding analyses showed that greater levels of anticipatory muscle recruitment  
424 relate to the choice to use the associated arm to reach to the target. These results lead us to  
425 wonder when muscle activity predicts which arm was going to move, and whether this time  
426 relates in a systematic way to the latency or expression of an express arm response. To address  
427 this, we performed a time-series ROC analysis to compare the muscle activity when the arm was  
428 chosen to reach or not and searched for the time at which an ideal observer could correctly  
429 discriminate arm choice from such EMG activity (see Methods). The inset of **Figure 6** shows  
430 one example of this analysis, showing the average activity of left PEC muscle for the exemplar  
431 participant preceding left or right arm reaches to the 0 cm target (top plot, blue or red traces  
432 respectively), as well as the associated time-series ROC (bottom plot). For this example, the  
433 discrimination time at which EMG activity reliably predicted which arm would reach was 69 ms  
434 after target onset, which preceded the express arm response. Across our entire sample, and  
435 regardless of whether participants exhibited an express arm response or not, we observed no  
436 systematic relationship between the discrimination time indicating which arm would move and  
437 the latency of express arm responses, with discrimination times variably preceding, occurring  
438 within, or following the express arm response epoch (**Figure 6**). We also observed no obvious  
439 relationship between this discrimination time and the generation of express arm responses;  
440 subjects exhibited express arm responses regardless of whether the discrimination time occurred  
441 earlier or later than the express arm response. This analysis reveals a lack of any relationship  
442 between aspects of muscle recruitment reflecting arm choice and the timing and expression of  
443 the express arm response.

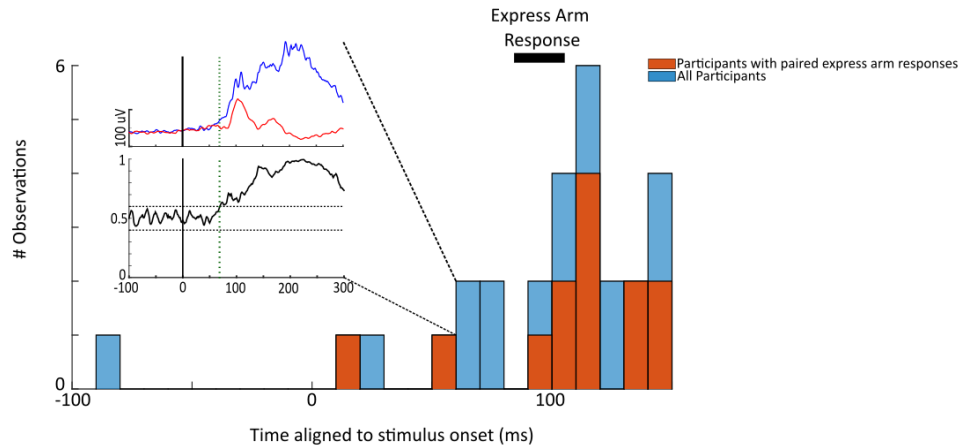

444

445 Figure 6. Time of arm choice discrimination based on muscle activity. Histogram of the times of  
446 muscle discrimination, organized into bins of 10ms. Orange bins depict observations where the  
447 participant exhibited an express arm response on a given muscle when the associated arm was  
448 selected to reach or not. Blue bins depict observations where express arm responses were not  
449 observed. Inset plot shows data from the exemplar participant, with the top plot depicting mean  
450 EMG (+/- SE) from left PEC for reaches using the left (blue) or right (red) arm, and the bottom  
451 plot showing the time-series ROC analysis used to determine the time at which muscle activity predicts  
452 arm choice. Green vertical dotted lines in the inset represents the time of discrimination (69 ms).

453

#### 454 *Kinematic Consequences of the Express arm response*

455 The express arm response is a brief period of muscle recruitment that increases muscle  
456 force. Previous work with unimanual anti-reach, delay, or stop-signal tasks has shown that  
457 express arm responses can produce small, task inappropriate, movements toward a target (4, 24,  
458 25). The non-reaching arm provides an opportunity to study the kinematic consequences of  
459 express arm responses in isolation from ensuing reach-related activity. First, we looked at the  
460 velocity of both the reaching and non-reaching arm at every location and consistently saw a  
461 small movement towards the target in the non-reaching arm. This can be seen in **Figure 7A**  
462 where we have plotted horizontal velocity from the exemplar participant for both the reaching  
463 and non-reaching arms at every location. As expected, the velocity is much higher in the  
464 reaching arm than in the non-reaching arm, but there is clearly a small deviation of the non-  
465 reaching arm toward the target (the insets in **Figure 7A**). To quantify the non-reaching arm's

466 peak velocity and allow cross-participant comparisons, we normalized it by the peak velocity of  
467 the reaching arm. We found on average the non-reaching arm had a peak velocity that was  $8.11 \pm$   
468  $2.69\%$  of the reaching arm. Compared to a null hypothesis that no movement occurs in the non-  
469 reaching arm, the non-reaching arm did indeed move towards the stimulus (Student's t-test,  $p <$   
470  $0.001$ ,  $t = -15.9768$ ,  $df = 27$ ). Next, we compared the peak velocity in the non-reaching arm  
471 based on whether an express arm response was observed but did not find any difference in peak  
472 velocity based on whether an express arm response was observed (peak velocity:  $8.53 \pm 2.15\%$ )  
473 or not (peak velocity:  $7.35 \pm 3.45\%$ ) (**Figure 7B**; paired t-test,  $p > 0.05$ ). Thus, although the non-  
474 reaching arm did move toward the target, the peak velocity of this movement was unrelated to  
475 the detection of an express arm response. This is a somewhat surprising result, but we note that  
476 our method for detecting express arm responses may have had a high rate of false negatives  
477 where the slope of EMG activity during the express arm response epoch did not differ  
478 significantly from the slope of EMG activity during the anticipatory interval (e.g., see EMG data  
479 for left and right PEC for left arm reaches in Fig. 3A at the 0 cm target; although there appears to  
480 be an express arm response in both muscles, our detection method did not detect an express arm  
481 response in either situation).

482



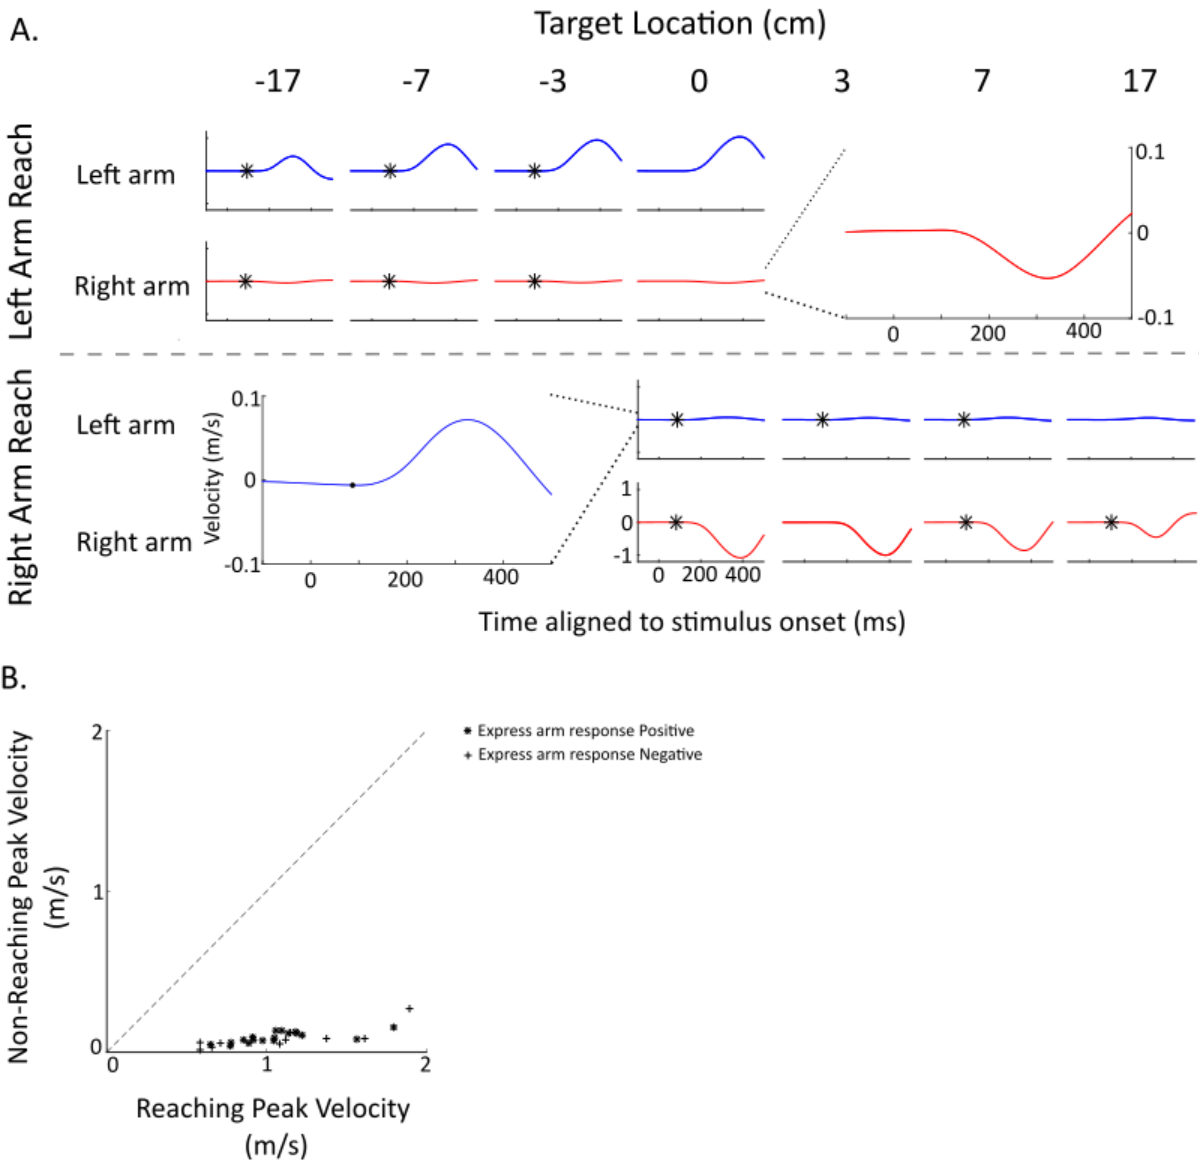

483

484 Figure 7. Velocity traces for the exemplar participant. A) Average velocity (+/- SE) for both the  
485 reaching and non-reaching arm across locations, with a black star representing the latency of the  
486 express arm response when present. Expanded graphs represent the velocity trace from the non-  
487 reaching arm at the target of subjective equality, at an enlarged y-axis scale. B) Scatter plot  
488 showing the peak velocity of the reaching vs non-reaching arm. Black dashed line shows line of  
489 unity and symbols depict whether an express arm response was observed on the non-reaching  
490 arm or not.

491

492 A key behavioural correlation seen in previous research using unimanual tasks is that  
493 larger express arm responses tend to precede shorter-latency reach RTs (1, 4). Given that this  
494 study is the first to study express arm responses in a bimanual task, we examined our data for the

495 presence of any relationships between express arm responses and RTs. We first confirmed that  
496 the express arm response magnitude in the reaching arm is negatively correlated to reach RT (left  
497 panel of **Figure 8A** shows trial-by-trial data for the right PEC from the exemplar participant;  
498 right panel of **Figure 8A** shows that the r-values across all participants with an express response  
499 at the target of equal selection lay significantly below zero; average  $r = -0.3436$ ,  $p < 0.001$ ,  $t =$   
500  $8.35$ ,  $df = 17$ ). Next, we examined whether the magnitude of the express arm response on the  
501 non-reaching arm related to the RT of the reaching arm, as a common drive mechanism predicts  
502 that a larger express arm muscle response on the non-reaching arm should precede shorter  
503 latency RTs on the reach arm. However, we found no relationship between the magnitude of the  
504 express arm response on the non-reaching arm and the RT of the reaching arm either in the  
505 exemplar participant (left panel of **Figure 8B**) or across the sample (the distribution of r-values  
506 in right panel in **Figure 8B** does not differ from zero, average  $r = -0.0045$ ,  $p > 0.05$ ,  $t = 0.15$ ,  $df =$   
507  $17$ ). Instead, as we were able to occasionally extract a RT from the movement of the non-  
508 reaching arm, we found a weaker albeit significant negative correlation between non-reaching  
509 express arm response magnitude and non-reaching movement RT (left panel of **Figure 8C** for  
510 exemplar participant; right panel of **Figure 8C** for the sample; average  $r = -0.16$ ,  $p = 0.001$ ,  $t =$   
511  $3.8020$ ,  $df = 17$ ). This final negative correlation does show a relationship between the express  
512 arm response on the non-reaching arm and the reaction time for the small movement of that arm,  
513 even when the other arm intercepts the target.

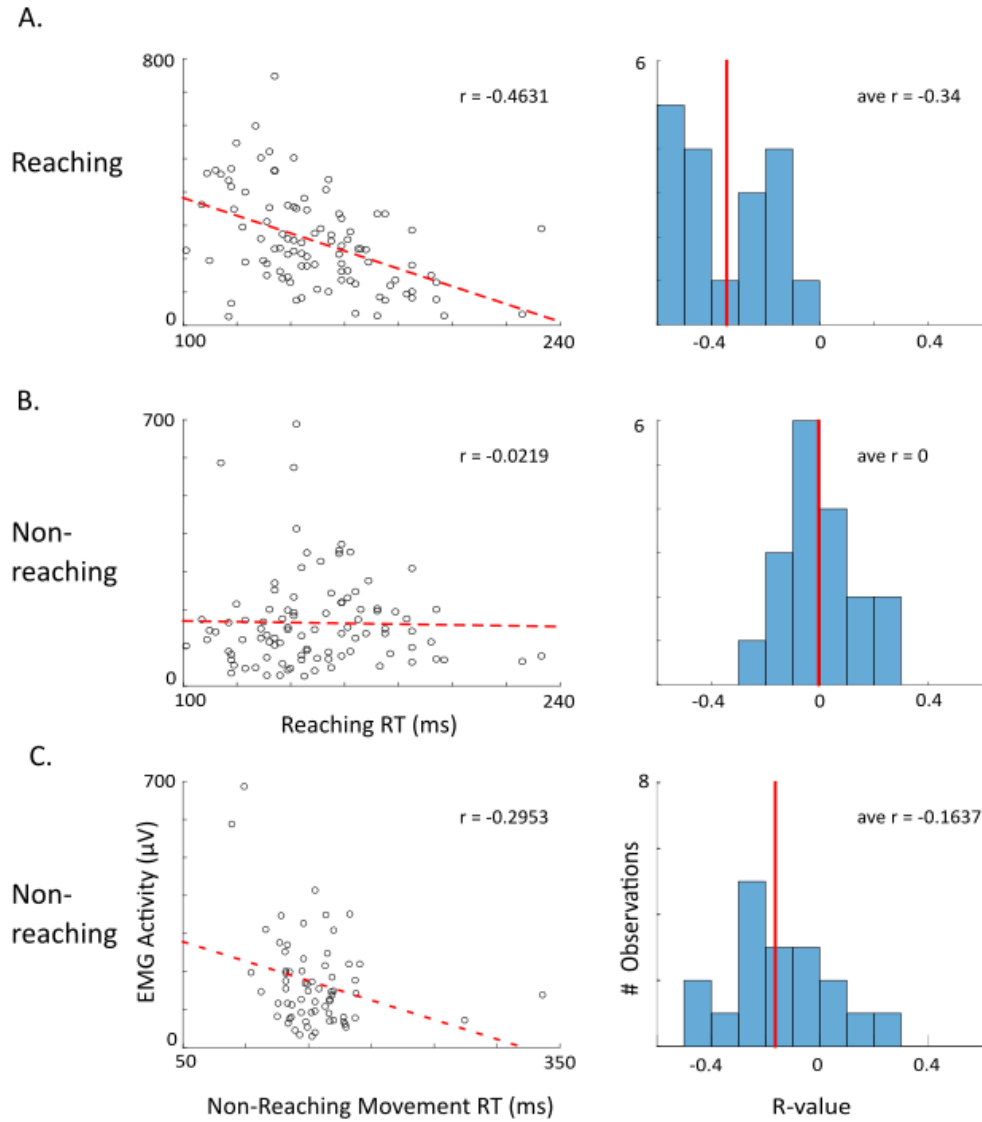

514

515 Figure 8. Correlations for express arm response magnitude and associated reaction time. A) In  
516 both the exemplar participant (Left; each point represents data from a single trial) and population  
517 (Right) there is a negative trial-by-trial correlation between the magnitude of the express arm  
518 response in the reaching arm and the reaction time of the movement. B) No such negative  
519 relationship was observed between the magnitude of the express arm response on the non-  
520 reaching arm and the reaction time of the reaching arm for either the exemplar participant or  
521 across the sample. C) A weaker negative correlation was observed between the express arm  
522 response on the non-reaching arm and the reaction time of the non-reaching arm (when a  
523 movement was present).

## 524 **Discussion**

525           We investigated whether the express arm response occurs bilaterally in a task where  
526 either arm can be used to intercept a target. We were particularly interested in the prevalence,  
527 timing, and magnitude of any express arm responses in the reaching versus non-reaching arm, as  
528 well as how these measures related to anticipatory muscle recruitment attained just before the  
529 express arm response and the kinematics of any associated movement. We found that express  
530 arm responses occur with equal prevalence on both the reaching and non-reaching arms, and that  
531 express arm response magnitude interacted with the preceding level of anticipatory activity.  
532 Express arm responses on the non-reaching arm did relate to aspects of small movements of the  
533 non-reaching arm, consistent with this phase of muscle recruitment imparting functional  
534 consequences. When integrated with reports in the literature on express arm responses in  
535 unimanual tasks, our results are consistent with a reticular relay of signals arising soon after  
536 target onset in the superior colliculus, and the interaction of such signals with pre-existing  
537 activity related to the anticipation of target appearance that presumably have a cortical origin.  
538 Interactions between cortical and subcortical descending pathways may occur at spinal or  
539 supraspinal levels.

540

### 541 *Comparison to past studies and methodological considerations*

542           The emerging target paradigm (18) has emerged as an efficient means to elicit express  
543 arm responses, increasing the prevalence and magnitude of the response (5, 9, 19). Past work has  
544 investigated how certainty about the time of target emergence (5), cueing (19), or the properties  
545 of the emerging target (5, 9) influence the express arm response. All such work using the  
546 emerging target task, as well as all past studies of the express arm response (1, 4, 10)

547 investigated reaches made with one arm. In contrast, in our modified emerging target paradigm,  
548 either arm could be used to intercept the target while muscle activity was recorded bilaterally.  
549 Further, we increased the number of potential target locations from two used previously to seven.  
550 Despite these changes, express arm responses were reliably observed, as all participants  
551 exhibited an express arm response to at least one target. We attribute this to the modified  
552 paradigm maintaining implied motion behind the barrier and a high degree of certainty about the  
553 time of target emergence, which have been suggested to be the main factors increasing express  
554 arm response prevalence and magnitude in this paradigm (5, 9, 18).

555         In our study, participants were required to choose which arm reached to the emerging  
556 target, doing so as quickly as possible. Previous work has shown that arm choice tends to reflect  
557 the hemifield of the target, with a slight bias to use the dominant hand at center (26, 27). In the  
558 modified emerging target paradigm used in this study, the logarithmic spacing of the targets  
559 under the occluder was chosen to try to find a target location which would elicit reaches from the  
560 right arm on some trials and from the left arm on others. Previous versions of a hand-choice task  
561 did not instruct participants to reach as fast as possible (26, 27) leading to the possibility that the  
562 dominant hand would be used for all targets in this version of the modified emerging target  
563 paradigm. Instead, we found that even with the added pressure to be fast, hand choice still  
564 largely reflected the hemifield of presentation.

565         Our overall task design was intended to find, for each subject, a target location that  
566 elicited reaches with the right arm on some trials, and with the left arm on others; doing so  
567 enabled evaluation of muscle activity and express arm responses as a function of whether the  
568 associated arm was selected to reach or not, for movements to the exact same visual target. For  
569 most participants ( $n = 10$ ), this target of equal selection was the center, of 0 cm, target. Assuming

570 participants followed task instruction, this center target would be almost (~1 degree below) at the  
571 fovea. Given that foveal visual stimuli are represented bilaterally in the superior colliculus (28),  
572 could this explain our observation of bilateral express arm responses? We think this is unlikely  
573 for three reasons. First, equivalent results were obtained for the four participants who had off-  
574 centre targets of equal selection (two participants at each of 3 or 7 cm to the left, equating to ~3  
575 or 7 degrees of visual angle); such visual targets are represented unilaterally in the superior  
576 colliculus. Second, targets that were not the target of equal selection still provoked bilateral  
577 responses; it was simply that reaches to these locations were predominantly done by one arm.  
578 Third, past work dissociating initial eye and hand position have shown that the express arm  
579 responses encode the location of the visual stimulus relative to the current position of the hand,  
580 not the eye (3).

581         Our paradigm was not designed to control for the retinal velocity of the moving target. As  
582 a consequence of our setup, the retinal image of the central target moved more rapidly than the  
583 image of more peripheral targets. That being said, we did not find any influence of target  
584 location on the magnitude of express arm responses on either the reaching or non-reaching arm.  
585 Previous work has reported that faster moving targets evoke larger express arm responses (9),  
586 but the range of actual retinal velocities used in our experiment may not have been large enough  
587 to reveal this effect. Related work by Cross and colleagues in 2019 requiring on-line corrections  
588 following a jump in cursor position has also found that the earliest visuomotor responses are  
589 invariant for jumps that are greater than 2 cm in magnitude (29). Given these results, the lack of  
590 any relationship between target location and express arm response magnitude is not surprising,  
591 although future work that more systematically investigates this question may be needed.

592 Another key difference between the current and past studies is the location of potential  
593 targets relative to the starting position of the hand. In past work, potential targets were positioned  
594 to the left and right of the starting position of the hand, and express arm responses were detected  
595 via analysis of increases or decreases in muscle activity following target presentation into or out  
596 of the muscle's preferred direction of movement. Here, all targets lay medial to the starting  
597 position of the hand, and hence in the preferred direction for pectoralis major. We accordingly  
598 developed a new method for detecting express arm responses, which depended on significant  
599 differences in the slopes of linear regressions fit to EMG activity during an anticipatory and  
600 express arm response interval. This method appears to be conservative, classifying instances of  
601 muscle recruitment as not exhibiting an express arm response despite an obvious inflection in  
602 muscle recruitment in the express arm response interval (e.g., see the data from left-PEC for the  
603 0cm target in **Figure 3A**). When express arm responses were detected with this method, they  
604 invariably displayed the characteristic trial-by-trial changes in muscle recruitment that were  
605 more aligned to target rather than movement onset (e.g., **Figure 3B**). The lack of specificity of  
606 our detection method, which leads to an increased rate of false negatives (like the data shown in  
607 **Figure 3A**) may partly explain the absence of relationship between the presence or absence of  
608 express arm responses and peak velocity on the non-reaching arm (**Figure 7B**)

609 Express arm responses were observed in the reaching and non-reaching arm regardless of  
610 whether the dominant or non-dominant arm was chosen to reach. However, all participants  
611 included in the analysis were either right hand dominant ( $n = 12$ ) or ambidextrous ( $n = 2$ ) as  
612 determined by the handedness questionnaire. Previous studies of express arm responses have  
613 similarly reported a low number of left-handed participants (1, 5, 9), but there has been no  
614 suggestion of any difference in the results of left- and right-handed participants. We speculate

615 that the express arm response would remain bilateral in left-hand dominant participants, but  
616 further studies using a larger proportion of left-handed participants would be needed to confirm  
617 this assertion.

618

619 *Interactions between anticipatory recruitment, the express arm response, and voluntary reach-*  
620 *related activity*

621 In our task, all targets emerged medial to the starting position of the hand. Combined  
622 with certainty about the time of target emergence, it is not surprising that participants anticipated  
623 target emergence to a degree that influenced muscle recruitment. Such anticipatory recruitment,  
624 which we presume has a cortical origin as participants become quite familiar with task structure  
625 over repeated trials, influenced the magnitude but not timing of the express arm response;  
626 participants with greater levels of anticipatory recruitment tended to have larger express arm  
627 responses (**Figure 5E**), and both anticipatory recruitment and express arm muscle responses  
628 tended to be larger when the associated arm was selected to reach (**Figure 5C,D**). Although our  
629 experiment was not designed to systematically vary the muscle recruitment immediately  
630 preceding the express arm response, the relationships between anticipatory recruitment and  
631 express arm responses resemble gain scaling seen for the spinal stretch reflex following a  
632 mechanical perturbation of the arm (30). Gain scaling likely arises from intrinsic properties at the  
633 motoneuron pool from the size-recruitment principle; importantly, recruitment from subsequent  
634 longer-loop reflexes any not be gain-scaled, if it were to be counterproductive to the task at hand.  
635 A future line of research should investigate whether the express arm response indeed exhibits  
636 gain scaling; this could be done by systematically varying the loading force on the muscle of



637 interest, and investigating the influence on both the express arm responses and on ensuing phases  
638 of recruitment.

639         Regardless of whether the relationship between anticipatory activity and the magnitude of  
640 the express arm response arises from gain scaling, anticipatory activity in some participants was  
641 significantly greater on the arm that ultimately reached to the target. This is apparent in the time-  
642 series ROC analysis in **Figure 7**, where arm choice could frequently be predicted by analyzing  
643 muscle activity preceding the express arm response interval. Such anticipatory recruitment  
644 suggests that some participants have already committed, to some degree, which arm they were  
645 more likely to use to reach to the target. We can only speculate as to why this may be the case; it  
646 may be because of trial history or fatigue (e.g., a bias to move one arm if the other arm was used  
647 on the previous trials). Development of a bias favoring one arm over the other may explain the  
648 lack of a relationship between the magnitude of the express arm response on the non-reaching  
649 arm and the reaction time of the reaching arm (**Figure 8B**), as a common bilateral drive to both  
650 muscles would predict a negative relationship between the express arm response magnitude of  
651 either arm and the reach RT. Instead, since the magnitude of the express arm response is also  
652 influenced by anticipatory activity, a bias in anticipatory activity toward the reaching arm and  
653 against the non-reaching arm muted the magnitude of the express arm response on the latter.

654         A common observation in previous work is that larger express arm responses precede  
655 shorter RTs (1, 4), and we observed a similar relationship here. Importantly, this was observed  
656 on the muscles of both the reaching and non-reaching arm and the reaction time of the associated  
657 arm (when a reaction time for the non-reaching arm could be extracted). A comparison of the  
658 evolution of muscle activity on the reaching versus non-reaching arm is quite interesting;  
659 whereas express arm responses are readily apparent on both, subsequent phases of more

660 prolonged recruitment are only observed on the reaching arm. The kinematics of movement of  
661 the non-reaching arm provides an opportunity to better understand the kinetic consequences of  
662 the relatively brief express arm response, and similar to previous results (4, 24, 25), the express  
663 arm response is associated with a small movement of the non-reaching arm toward the target.  
664 This reaffirms that, despite the relatively brief nature of the express arm response, it is not  
665 without a kinetic consequence even on the non-reaching arm. Further, an express arm response  
666 on the reaching arm may also influence the kinetic consequences of the ensuing phases of  
667 voluntary reach-related activity through repeated activation of the same muscle fiber (31).

668

669 *Is the reticular formation involved in the express arm response?*

670         There is considerable circumstantial evidence that express arm responses arise from  
671 signalling along a tecto-reticulo-spinal pathway (1, 4, 10, 16, 24). Many of the key response  
672 properties of express arm responses resemble those of express saccades, in which the role of the  
673 superior colliculus is well understood (32, 33). Further, the related phenomenon of express neck  
674 responses has been directly correlated to visual responses in the intermediate superior colliculus  
675 of monkeys (34). The interface between the superior colliculus and motor periphery is likely  
676 indirect, and our work here adds to a small body of literature that more has considered the  
677 potential involvement of other interfaces. For example, Glover and Baker (2019) reported  
678 enhanced express arm responses (what they termed rapid visual responses) in a unimanual  
679 response task when visual stimuli were combined with other auditory, vestibular, or  
680 somatosensory stimuli. Such non-visual stimuli are thought to enhance responses in the reticular  
681 formation, hence they attributed the facilitation they observed on express arm responses to the  
682 influence of such non-visual stimuli in the reticular formation (2). Further, using an elegant

683 combination of transcranial brain stimulation and electrical stimulation of the median nerve,  
684 Nakajima, Suzuki and colleagues proposed that rapid limb responses to changing visual inputs  
685 attested to the integration within cervical interneurons of corticospinal inputs with visual  
686 information rapidly relayed along a subcortical tectoreticulospinal pathways (35, 36). Whether  
687 cervical interneurons are involved in the generation of express arm responses, perhaps in  
688 conjunction to the reticular formation, remains to be determined but this seems likely given the  
689 broad convergence between descending motor pathways (37).

690 Another area of future research should address how malleable the bilateral distribution of  
691 express visuomotor responses would be with changes in body posture, target position, or loading  
692 force. Our positioning of targets medial to both hands, with loading forces in the opposite  
693 direction, meant that pectoralis major was the only muscle on which the bilateral distribution of  
694 express muscle responses could have been assessed. Having established that express arm  
695 responses can be distributed bilaterally, future experiments should look at other limb muscles, or  
696 configurations where a given target could be reached by contraction of a given muscle in one  
697 arm or relaxation of the same muscle on the other arm (e.g., by altering loading forces). Indeed,  
698 although there is substantial variability, the most common bilateral recruitment profile evoked by  
699 stimulation of the reticular formation is ipsilateral muscle facilitation and contralateral muscle  
700 suppression (38). If the pathway mediating the bilateral distribution of express muscle responses  
701 is to have any functional benefit, it would seem to be a necessity to be able to flexibly map target  
702 locations onto different combinations of bilateral muscle recruitment.

703

704 *Conclusions*

705 Our work here contributes to the understanding of the phenomenology of express arm responses,  
706 showing for the first time to our knowledge that the underlying pathway distributes the motor  
707 signal bilaterally. Our results are largely consistent with the involvement of the reticular  
708 formation as an interface between the superior colliculus and motor periphery. Our overall  
709 hypothesis is that signalling along the tectoreticulospinal pathway initiates the first wave of limb  
710 muscle recruitment in circumstances requiring rapid visually-guided reaching. We are mindful  
711 however of the possibility of the convergence of cortical inputs into all nodes of this pathway,  
712 including the superior colliculus, the reticular formation, spinal interneuron networks, and the  
713 motoneuron. Rather than being directly involved in express arm responses, cortical inputs into  
714 these subcortical nodes, for example with anticipatory signals that bias arm choice, can dampen,  
715 or augment the vigor of the earliest visually-related responses. Further characterization of the  
716 properties of express arm responses, and the integration of such signalling with task-relevant  
717 information, can more precisely address the underlying neural mechanisms and the integration of  
718 such signalling with cortical inputs that initiate and guide our most rapid visually-guided  
719 behaviours.

720

721

722

723

724 References

- 725 1. **Andrew Pruszynski J, King GL, Boisse L, Scott SH, Randall Flanagan J, Munoz DP.**  
726 Stimulus-locked responses on human arm muscles reveal a rapid neural pathway linking  
727 visual input to arm motor output. *European Journal of Neuroscience* 32: 1049–1057,  
728 2010. doi: 10.1111/j.1460-9568.2010.07380.x.
- 729 2. **Glover IS, Baker SN.** Multimodal stimuli modulate rapid visual responses during  
730 reaching. *Journal of Neurophysiology* 122: 1894–1908, 2019. doi: 10.1152/jn.00158.2019.
- 731 3. **Gu C, Pruszynski J, Gribble P, Corneil B.** Done in 100 ms: path-dependent visuomotor  
732 transformation in the human upper limb. *Journal of neurophysiology* 119: 1319–1328,  
733 2018. doi: 10.1152/JN.00839.2017.
- 734 4. **Gu C, Wood DK, Gribble PL, Corneil BD.** A trial-by-trial window into sensorimotor  
735 transformations in the human motor periphery. *Journal of Neuroscience* 36: 8273–8282,  
736 2016. doi: 10.1523/JNEUROSCI.0899-16.2016.
- 737 5. **Contemori S, Loeb GE, Corneil BD, Wallis G, Carroll TJ.** The influence of temporal  
738 predictability on express visuomotor responses. *Journal of Neurophysiology* 125: 731–  
739 747, 2021. doi: 10.1152/JN.00521.2020.
- 740 6. **Pare M, Munoz DP.** Saccadic reaction time in the monkey: advanced preparation of  
741 oculomotor programs is primarily responsible for express saccade occurrence.  
742 <https://doi.org/10.1152/jn.1996.76.6.3666> 76: 3666–3681, 1996. doi:  
743 10.1152/JN.1996.76.6.3666.
- 744 7. **Fischer B, Ramsperger E.** Experimental Brain Research Human express saccades:  
745 extremely short reaction times of goal directed eye movements. *Exp Brain Res* 57: 191–  
746 195, 1984.
- 747 8. **Everling S, Dorris MC, Klein RM, Munoz DP.** Role of Primate Superior Colliculus in  
748 Preparation and Execution of Anti-Saccades and Pro-Saccades. *Journal of Neuroscience*  
749 19: 2740–2754, 1999. doi: 10.1523/JNEUROSCI.19-07-02740.1999.
- 750 9. **Kozak RA, Corneil BD.** High contrast, moving targets in an emerging target paradigm  
751 promote fast visuomotor responses during visually guided reaching. .
- 752 10. **Kozak RA, Kreyenmeier P, Gu C, Johnston K, Corneil BD.** Stimulus-locked responses  
753 on human upper limb muscles and corrective reaches are preferentially evoked by low  
754 spatial frequencies. *eNeuro* 6, 2019. doi: 10.1523/ENEURO.0301-19.2019.
- 755 11. **Ludwig CJH, Gilchrist ID, McSorley E.** The influence of spatial frequency and contrast  
756 on saccade latencies. *Vision Research* 44: 2597–2604, 2004. doi:  
757 10.1016/J.VISRES.2004.05.022.
- 758 12. **Chen C-Y, Sonnenberg L, Weller S, Witschel T, Hafed ZM.** Spatial frequency  
759 sensitivity in macaque midbrain. *Nature Communications* 2018 9:1 9: 1–13, 2018. doi:  
760 10.1038/s41467-018-05302-5.
- 761 13. **Goonetilleke SC, Katz L, Wood DK, Gu C, Huk AC, Corneil BD.** Cross-species  
762 comparison of anticipatory and stimulus-driven neck muscle activity well before saccadic  
763 gaze shifts in humans and nonhuman primates. <https://doi.org/10.1152/jn.00230.2015> 114:  
764 902–913, 2015. doi: 10.1152/JN.00230.2015.
- 765 14. **Nudo RJ, Masterton RB.** Descending pathways to the spinal cord: II. Quantitative study  
766 of the tectospinal tract in 23 mammals. *Journal of Comparative Neurology* 286: 96–119,  
767 1989. doi: 10.1002/cne.902860107.

- 768 15. **Grantyn A, Grantyn R.** *Axonal Patterns and Sites of Termination of Cat Superior*  
769 *Colliculus Neurons Projecting in the Tecto-Bulbo-Spinal Tract.* 1982.
- 770 16. **Corneil BD, Munoz DP.** Overt responses during covert orienting. *Neuron* 82 Cell Press:  
771 1230–1243, 2014.
- 772 17. **Davidson AG, Schieber MH, Buford JA.** Bilateral spike-triggered average effects in arm  
773 and shoulder muscles from the monkey pontomedullary reticular formation. *Journal of*  
774 *Neuroscience* 27: 8053–8058, 2007. doi: 10.1523/JNEUROSCI.0040-07.2007.
- 775 18. **Kozak R, Corneil B.** Stimulus-locked responses on human upper limb muscles prefer low  
776 spatial frequency, high contrast, and fast moving targets. *Journal of Vision* 20: 554, 2020.  
777 doi: 10.1167/jov.20.11.554.
- 778 19. **Contemori S, Loeb GE, Corneil BD, Wallis G, Carroll TJ.** Trial-by-trial modulation of  
779 express visuomotor responses induced by symbolic or barely detectable cues. .
- 780 20. **Oldfield RC.** *THE ASSESSMENT AND ANALYSIS OF HANDEDNESS: THE*  
781 *EDINBURGH INVENTORY.* Pergamon Press, 1971.
- 782 21. **Veale JF.** Edinburgh Handedness Inventory - Short Form: A revised version based on  
783 confirmatory factor analysis. *Laterality* 19: 164–177, 2014. doi:  
784 10.1080/1357650X.2013.783045.
- 785 22. **Corneil BD, Olivier E, Munoz DP.** Visual responses on neck muscles reveal selective  
786 gating that prevents express saccades. *Neuron* 42: 831–841, 2004. doi: 10.1016/S0896-  
787 6273(04)00267-3.
- 788 23. **Goonetilleke SC, Katz L, Wood DK, Gu C, Huk AC, Corneil BD.** Cross-species  
789 comparison of anticipatory and stimulus-driven neck muscle activity well before saccadic  
790 gaze shifts in humans and nonhuman primates. *Journal of Neurophysiology* 114: 902–913,  
791 2015. doi: 10.1152/jn.00230.2015.
- 792 24. **Wood DK, Gu C, Corneil BD, Gribble PL, Goodale MA.** Transient visual responses  
793 reset the phase of low-frequency oscillations in the skeletomotor periphery. *European*  
794 *Journal of Neuroscience* 42: 1919–1932, 2015. doi: 10.1111/EJN.12976.
- 795 25. **Atsma J, Maij F, Gu C, Medendorp WP, Corneil BD.** Active Braking of Whole-Arm  
796 Reaching Movements Provides Single-Trial Neuromuscular Measures of Movement  
797 Cancellation. *Journal of Neuroscience* 38: 4367–4382, 2018. doi:  
798 10.1523/JNEUROSCI.1745-17.2018.
- 799 26. **Bryden PJ, Pryde KM, Roy EA.** A performance measure of the degree of hand  
800 preference. *Brain and Cognition* 44: 402–414, 2000. doi: 10.1006/brcg.1999.1201.
- 801 27. **Bryden MP, Singh M, Steenhuis RE, Clarkson KL.** A behavioral measure of hand  
802 preference as opposed to hand skill. *Neuropsychologia* 32: 991–999, 1994. doi:  
803 10.1016/0028-3932(94)90048-5.
- 804 28. **Chen CY, Hoffmann KP, Distler C, Hafed ZM.** The Foveal Visual Representation of  
805 the Primate Superior Colliculus. *Current Biology* 29: 2109–2119.e7, 2019. doi:  
806 10.1016/j.cub.2019.05.040.
- 807 29. **Cross KP, Cluff T, Takei T, Scott SH.** Visual feedback processing of the limb involves  
808 two distinct phases. *Journal of Neuroscience* 39: 6751–6765, 2019. doi:  
809 10.1523/JNEUROSCI.3112-18.2019.
- 810 30. **Pruszynski JA, Kurtzer I, Lillicrap TP, Scott SH.** Temporal Evolution of “Automatic  
811 Gain-Scaling.” <https://doi.org/10.1152/jn000852009> 102: 992–1003, 2009. doi:  
812 10.1152/JN.00085.2009.

- 813 31. **Loeb GE, Tsianos GA.** Muscle and Limb Mechanics. *Comprehensive Physiology* 7: 429–  
814 462, 2017. doi: 10.1002/cphy.c160009.
- 815 32. **Edelman J, Keller E.** Activity of visuomotor burst neurons in the superior colliculus  
816 accompanying express saccades. *Journal of neurophysiology* 76: 908–926, 1996. doi:  
817 10.1152/JN.1996.76.2.908.
- 818 33. **Dorris M, Paré M, Munoz D.** Neuronal activity in monkey superior colliculus related to  
819 the initiation of saccadic eye movements. *The Journal of neuroscience : the official*  
820 *journal of the Society for Neuroscience* 17: 8566–8579, 1997. doi:  
821 10.1523/JNEUROSCI.17-21-08566.1997.
- 822 34. **Rezvani S, Corneil B.** Recruitment of a head-turning synergy by low-frequency activity  
823 in the primate superior colliculus. *Journal of neurophysiology* 100: 397–411, 2008. doi:  
824 10.1152/JN.90223.2008.
- 825 35. **Suzuki S, Nakajima T, Irie S, Ariyasu R, Ohtsuka H, Komiyama T, Ohki Y.**  
826 Subcortical Contribution of Corticospinal Transmission during Visually Guided Switching  
827 Movements of the Arm. .
- 828 36. **Nakajima T, Ohtsuka H, Irie S, Suzuki S, Ariyasu R, Komiyama T, Ohki Y.** Visual  
829 information increases the indirect corticospinal excitation via cervical interneurons in  
830 humans. <https://doi.org/10.1152/jn004252020> 125: 828–842, 2021. doi:  
831 10.1152/JN.00425.2020.
- 832 37. **Alstermark B, Isa T.** Circuits for skilled reaching and grasping. *Annual review of*  
833 *neuroscience* 35: 559–578, 2012. doi: 10.1146/ANNUREV-NEURO-062111-150527.
- 834 38. **Davidson AG, Buford JA.** Bilateral actions of the reticulospinal tract on arm and  
835 shoulder muscles in the monkey: stimulus triggered averaging. *Experimental Brain*  
836 *Research* 173: 25–39, 2006. doi: 10.1007/s00221-006-0374-1.  
837
